# Supplementary material for: Effect of Colchicine Binding Site Inhibitors on the Tubulin Intersubunit Interaction
Source: PubMed Central journal article supplement — ACS Omega. 2023 Aug 3;8(32):29448–54. doi: 10.1021/acsomega.3c02979 (PMC10433359; doi:10.1021/acsomega.3c02979), 2023-08-03
Supplement: ao3c02979_si_001.pdf [file ao3c02979_si_001.pdf]

## Supporting information

### Effect of colchicine binding site inhibitors on the tubulin intersubunit interaction

Arsen Sargsyan<sup>1#</sup>, Harutyun Sahakyan<sup>1,2#\*</sup>, Karen Nazaryan<sup>1</sup>

**1** Institute of Molecular Biology, National Academy of Sciences of the Republic of Armenia, Yerevan, Armenia

# These authors contributed equally

\* Corresponding author

Email addresses: a\_sargsyan@mb.sci.am (Arsen Sargsyan), harutyun.saakyan@nih.gov (Harutyun Sahakyan), karen.nazaryan@gmail.com (Karen Nazaryan)

**2** current address: National Center for Biotechnology Information, National Library of Medicine, National Institutes of Health, Bethesda, MD, USA

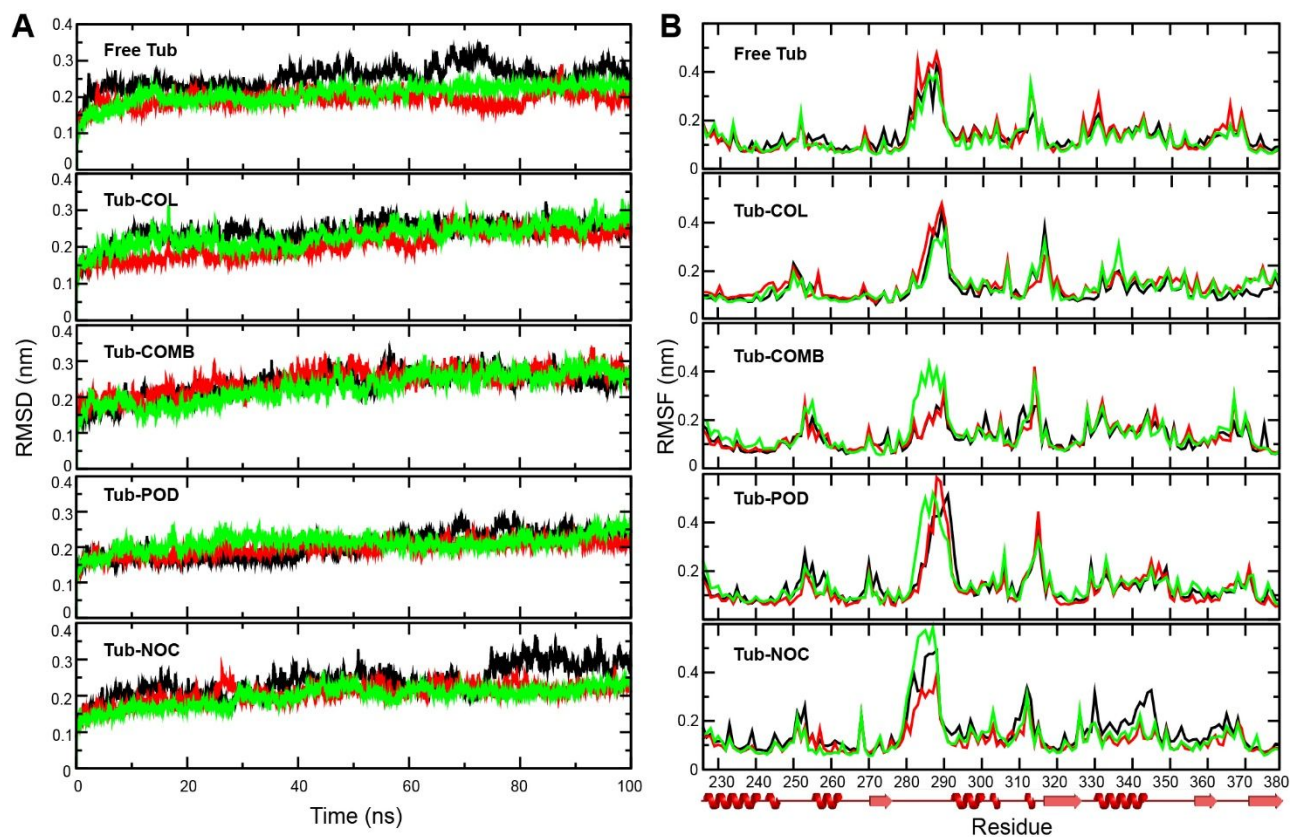

**Figure S1.** Protein-ligand complex stability in MD simulations. **A** Root-mean-square-deviation (RMSD) of tubulin dimer backbone atoms and ligand. **B** Root-mean-square-fluctuation (RMSF) of the C-terminal domain of beta-tubulin where the CBS is located.

| Ligand          | Y50 | Q134 | N165 | F167 | Y200 | M233 | V236 | T237 | C239 | L240 | Q245 | L246 | A248 | D249 | L250 | K252 | L253 | N256 | M257 | T312 | V313 | A314 | A315 | V316 | N348 | K350 | T351 | A352 | I368 |  |  |
|-----------------|-----|------|------|------|------|------|------|------|------|------|------|------|------|------|------|------|------|------|------|------|------|------|------|------|------|------|------|------|------|--|--|
| Colchicine      |     |      |      |      |      |      |      |      |      |      |      |      |      |      |      |      |      |      |      |      |      |      |      |      |      |      |      |      |      |  |  |
| Combretastatin  |     |      |      |      |      |      |      |      |      |      |      |      |      |      |      |      |      |      |      |      |      |      |      |      |      |      |      |      |      |  |  |
| Nocodazole      |     |      |      |      |      |      |      |      |      |      |      |      |      |      |      |      |      |      |      |      |      |      |      |      |      |      |      |      |      |  |  |
| Podophyllotoxin |     |      |      |      |      |      |      |      |      |      |      |      |      |      |      |      |      |      |      |      |      |      |      |      |      |      |      |      |      |  |  |

Legend:

- no contact (white)
- backbone contact (yellow)
- side chain contact (green)
- backbone+side chain (blue)

**Figure S2.** Interaction of different tubulin polymerization inhibitors with colchicine binding site. Data was collected from the Pocketome database.

**Table S1.** MMPBSA energy components for each complex. **EEL** electrostatic energy calculated from force field, **EPB** electrostatic contribution to the solvation free energy calculated by PB model, **VDWAALS** van der Waals contribution, **ENPOLAR** polar contribution to the solvation free energy,  **$\Delta G$  Gas/Solv** estimated binding free energy in vacuum and solvent,  **$\Delta G$  Total** final binding free energy calculated from all terms.

|            | <b>EEL</b> | <b>EPB</b> | <b>VDWAALS</b> | <b>ENPOLAR</b> | <b><math>\Delta G</math> Gas</b> | <b><math>\Delta G</math> Solv</b> | <b><math>\Delta G</math> Total</b> |
|------------|------------|------------|----------------|----------------|----------------------------------|-----------------------------------|------------------------------------|
| tub-gtp_1  | 1124.16    | -1031.21   | -124.32        | -13.16         | 999.83                           | -1045.19                          | -45.36                             |
| tub-gtp_2  | 1084.23    | -975.00    | -141.28        | -12.38         | 942.95                           | -991.26                           | -48.31                             |
| tub-gtp_3  | 1063.24    | -966.50    | -133.33        | -12.51         | 929.92                           | -981.79                           | -51.87                             |
| AVR        | 1090.54    | -990.90    | -132.98        | -12.68         | 957.57                           | -1006.08                          | -48.51                             |
| SD         | 25.26      | 28.71      | 6.93           | 0.34           | 30.36                            | 27.92                             | 2.66                               |
| SEM        | 14.59      | 16.58      | 4.00           | 0.20           | 17.53                            | 16.12                             | 1.54                               |
| tub-col_1  | 1203.30    | -1105.26   | -119.98        | -13.13         | 1083.31                          | -1118.41                          | -35.10                             |
| tub-col_2  | 1296.53    | -1198.32   | -116.15        | -13.47         | 1180.38                          | -1210.70                          | -30.32                             |
| tub-col_3  | 1302.48    | -1215.23   | -116.22        | -13.58         | 1186.27                          | -1227.74                          | -41.47                             |
| AVR        | 1267.44    | -1172.94   | -117.45        | -13.40         | 1149.99                          | -1185.62                          | -35.63                             |
| SD         | 45.42      | 48.35      | 1.79           | 0.19           | 47.21                            | 48.03                             | 4.57                               |
| SEM        | 26.22      | 27.91      | 1.03           | 0.11           | 27.25                            | 27.73                             | 2.64                               |
| tub-comb_1 | 1576.54    | -1478.36   | -119.30        | -13.98         | 1457.24                          | -1491.49                          | -34.25                             |
| tub-comb_2 | 1667.92    | -1548.44   | -120.41        | -16.27         | 1547.51                          | -1561.91                          | -14.40                             |
| tub-comb_3 | 1553.28    | -1457.73   | -117.37        | -15.29         | 1435.91                          | -1471.31                          | -35.40                             |
| AVR        | 1599.25    | -1494.84   | -119.03        | -15.18         | 1480.22                          | -1508.24                          | -28.02                             |
| SD         | 49.48      | 38.82      | 1.26           | 0.94           | 48.37                            | 38.84                             | 9.64                               |
| SEM        | 28.57      | 22.42      | 0.73           | 0.54           | 27.93                            | 22.42                             | 5.56                               |
| tub-pod_1  | 1498.07    | -1388.13   | -131.64        | -14.70         | 1366.44                          | -1402.83                          | -36.39                             |
| tub-pod_2  | 1551.81    | -1439.64   | -139.12        | -15.50         | 1412.69                          | -1455.14                          | -42.45                             |
| tub-pod_3  | 1589.80    | -1462.83   | -144.76        | -15.69         | 1445.04                          | -1478.53                          | -33.49                             |
| AVR        | 1546.56    | -1430.20   | -138.51        | -15.30         | 1408.06                          | -1445.50                          | -37.44                             |
| SD         | 37.63      | 31.22      | 5.37           | 0.43           | 32.26                            | 31.65                             | 3.73                               |
| SEM        | 21.73      | 18.02      | 3.10           | 0.25           | 18.62                            | 18.27                             | 2.16                               |
| tub-noc_1  | 1343.80    | -1279.82   | -117.12        | -13.97         | 1226.68                          | -1293.79                          | -67.10                             |
| tub-noc_2  | 1266.45    | -1186.54   | -124.94        | -14.62         | 1141.51                          | -1201.15                          | -59.65                             |
| tub-noc_3  | 1215.52    | -1131.32   | -128.32        | -14.92         | 1087.20                          | -1146.23                          | -59.03                             |
| AVR        | 1275.26    | -1199.22   | -123.46        | -14.50         | 1151.80                          | -1213.72                          | -61.93                             |
| SD         | 52.74      | 61.28      | 4.69           | 0.39           | 57.41                            | 60.89                             | 3.67                               |
| SEM        | 30.45      | 35.38      | 2.71           | 0.23           | 33.14                            | 35.16                             | 2.12                               |

**Movies S1-S5.** Visualization of tubulin subunits disassociation during steered molecular dynamics: S1 Free TUB, S2 Tub-COL, S3 Tub-CA4, Tub-POD', Tub-NOC.
